# Supplementary material for: Clinical and cognitive improvement following full-spectrum, high-cannabidiol treatment for anxiety: open-label data from a two-stage, phase 2 clinical trial
Source: Commun Med (Lond). 2022 Nov 2;2:139. doi: 10.1038/s43856-022-00202-8 (PMC9628346; doi:10.1038/s43856-022-00202-8)
Supplement: Supplementary file 3 — Supplemental Data [file 43856_2022_202_MOESM3_ESM.xlsx]

## Sheet: Baseline
Subject ID	BAI	STAI Y1	STAI Y2	HAM-A	OASIS
CBD_02	22	40	64	17	13
CBD_05	12	46	60	17	11
CBD_06	9	41	47	19	11
CBD_10	16	30	43	13	9
CBD_11	23	55	61	18	13
CBD_12	9	67	71	23	11
CBD_14	28	41	54	18	10
CBD_15	19	37	50	19	10
CBD_17	9	55	60	11	11
CBD_19	18	49	57	18	10
CBD_21	33	44	48	23	10
CBD_22	19	37	62	23	12
CBD_25	23	38	47	24	14
CBD_26	44	64	64	35	13

## Sheet: Week 1
Subject ID	BAI	STAI Y1	STAI Y2	HAM-A	OASIS
CBD_02	15	56	67	7	8
CBD_05	5	37	49	4	5
CBD_06	4	22	37	4	2
CBD_10	3	28	44	6	2
CBD_11	7	40	48	7	7
CBD_12	12	48	59	7	7
CBD_14	2	26	45	6	3
CBD_15	4	30	44	5	2
CBD_17	9	44	44	4	6
CBD_19	9	45	52	5	5
CBD_21	14	47	44	11	7
CBD_22	6	35	51	10	9
CBD_25	7	40	44	4	7
CBD_26	32	52	58	16	10

## Sheet: Week 2
Subject ID	BAI	STAI Y1	STAI Y2	HAM-A	OASIS
CBD_02	6	32	50	3	4
CBD_05	1	30	35	2	0
CBD_06	11	34	35	12	9
CBD_10	1	30	41	3	2
CBD_11	11	50	56	8	9
CBD_12	8	42	53	5	8
CBD_14	1	25	43	2	0
CBD_15	3	26	39	6	2
CBD_17	1	30	43	3	5
CBD_19	7	34	43	2	2
CBD_21	19	30	43	9	7
CBD_22	8	40	59	12	12
CBD_25	7	33	32	8	5
CBD_26	18	47	57	12	6

## Sheet: Week 3
Subject ID	BAI	STAI Y1	STAI Y2	HAM-A	OASIS
CBD_02	16	50	62	10	7
CBD_05	2	32	34	2	3
CBD_06	3	30	30	4	3
CBD_10	2	38	43	2	3
CBD_11	4	44	52	4	7
CBD_12	3	47	56	6	5
CBD_14	0	24	36	1	0
CBD_15	7	34	34	8	5
CBD_17	3	28	39	2	5
CBD_19	4	43	44	1	3
CBD_21	18	44	43	6	4
CBD_22	6	32	51	7	7
CBD_25	1	27	31	2	2
CBD_26	7	35	44	4	6

## Sheet: Week 4
Subject ID	BAI	STAI Y1	STAI Y2	HAM-A	OASIS
CBD_02	16	43	59	8	8
CBD_05	1	29	33	1	0
CBD_06	1	28	34	1	3
CBD_10	4	38	40	4	3
CBD_11	4	40	45	2	6
CBD_12	2	37	42	4	2
CBD_14	0	26	40	1	2
CBD_15	0	20	34	3	0
CBD_17	3	27	37	4	4
CBD_19	0	23	34	0	1
CBD_21	15	51	45	10	7
CBD_22	3	29	48	4	3
CBD_25	3	29	32	2	2
CBD_26	5	41	44	4	6
